# Supplementary material for: Trypsinogen 4 boosts tumor endothelial cells migration through proteolysis of tissue factor pathway inhibitor-2
Source: PubMed Central journal article supplement (PMC4695067; doi:10.18632/oncotarget.4949), 2015-07-22
Supplement: oncotarget-06-28389-s001.pdf [file oncotarget-06-28389-s001.pdf]

## Trypsinogen 4 boosts tumor endothelial cells migration through proteolysis of tissue factor pathway inhibitor-2

### Supplementary Material

| Cord formation | LDL uptake                          | CD31                                | vWF                                 | $\alpha$ SMA                    |
|----------------|-------------------------------------|-------------------------------------|-------------------------------------|---------------------------------|
|                | % positive cells<br>99.2 (96.9-100) | % positive cells<br>99.2 (96.5-100) | % positive cells<br>99.9 (99.6-100) | % positive cells<br>0.7 (0-1.4) |

  
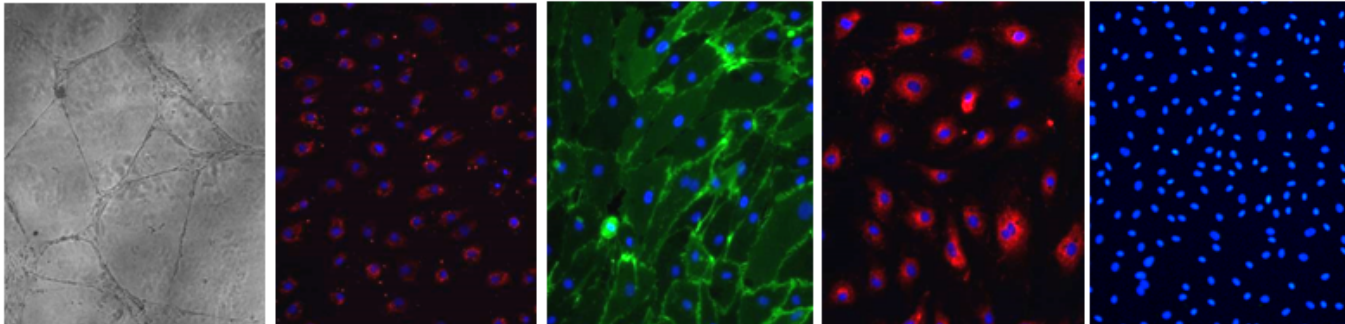

### Supplementary Figure 1: Characterization of endothelial cells

Endothelial cells isolated from human tumor tissues were characterized to confirm their endothelial origin. Cells formed cord-like structures on matrigel and took up LDL (red), stained positively for the typical endothelial markers CD31 (green) and von Willebrand Factor (red), but not for  $\alpha$ SMA, typical of smooth muscle cells (blue, DAPI-counterstained nuclei). Percentages of positive cells were calculated by analyzing the immunofluorescence results for not less than 500 cells. The values [average (range)] for 17 different endothelial cells populations are shown, together with representative captions.

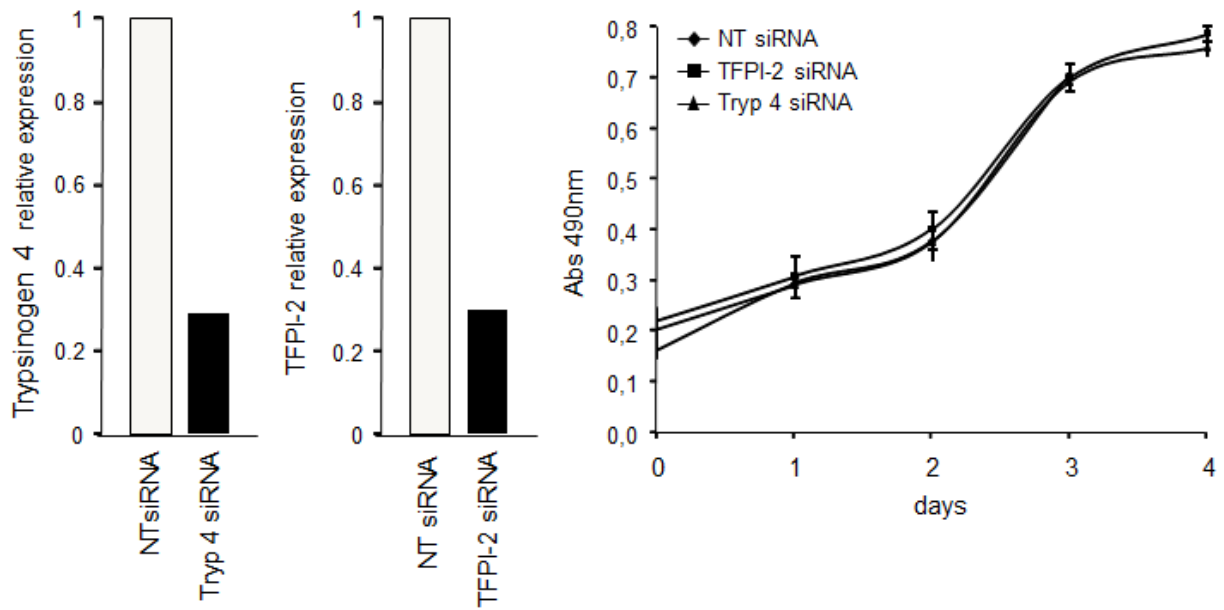

### Supplementary Figure 2: Effect of trypsinogen 4 and TFPI-2 silencing on tumor EC proliferation

The proliferative activity of endothelial cells transfected with trypsinogen 4, TFPI-2, or not targeting siRNA was the same. Proliferation was measured using the CellTiter96® AQueous Non-Radioactive Cell Proliferation Assay (Promega). Briefly,  $3 \times 10^3$  HOC-EC were plated into 96-well plates (six replicates) and placed at 37°C in 5% CO<sub>2</sub>. After 3h (time=0), 1, 2, 3 and 4 days 20 µl MTS solution were added to each well and incubated for 3h at 37°C in 5% CO<sub>2</sub>. The plates were thoroughly shaken, and the absorbance at 490nm was recorded with a microplate reader (Infinite®200, Tecan).

## Supplementary Table 1. Primers for RT-PCR analysis

The primer sequences used for RT-PCR with the amplicon lengths and target transcripts.

| Primer pair        | Target transcript                                                      | Primer             | Primer Sequences                                                      | Amplicon length |
|--------------------|------------------------------------------------------------------------|--------------------|-----------------------------------------------------------------------|-----------------|
| C                  | PRSS1 (NM_002769)<br>PRSS2 (NM_002770)<br>PRSS3 (NM_007343, NM_002771) | Forward<br>Reverse | 5' CAGGTGAGACTGGGAGAGCACAA 3'<br>5' ATAGTTGTAGACCTTGGTGTAGACTCCAGG 3' | 498 bp          |
| D                  | PRSS3<br>(NM_007343, NM_002771 )                                       | Forward<br>Reverse | 5' CCTAAATACAACAGGGACACTCTGGAC 3'<br>5' GTCAGCACCAAAGCTCAGAGTGTG 3'   | 170 bp          |
| E <sub>1</sub> +Er | TRYPSINOGEN 4<br>(NM_007343)                                           | Forward<br>Reverse | 5' ATGTGCGGACCTGACGAC 3'<br>5' GCAGTGAGCTGCTGATACCAC 3'               | 345 bp          |
| E <sub>2</sub> +Er | MESOTRYPSINOGEN<br>(NM_002771)                                         | Forward<br>Reverse | 5' ATGAATCCATTCTGATCCTTGC 3'<br>5' GCAGTGAGCTGCTGATACCAC 3'           | 191 bp          |

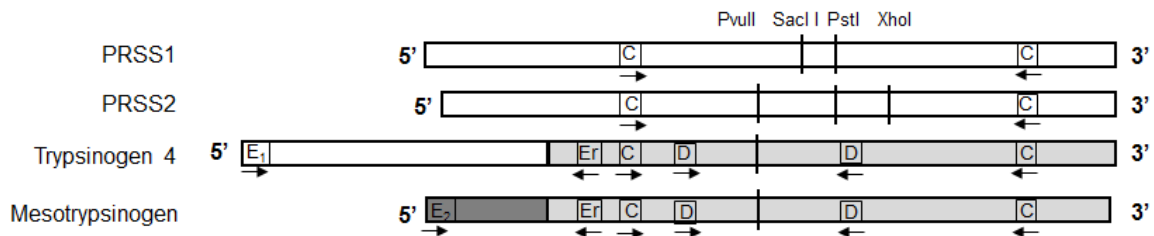

**Supplementary Table 2. Gene expression assays for quantitative RealTime PCR**

Shown are the Specific TaqMan® Gene Expression Assays used for RT-qPCR: the last column indicates whether the amplification was successful (+) or not (-) when RNA from tumor-EC was assayed (N= 7)

| <b>Target transcript</b>     | <b>Assay ID</b> | <b>Product length</b> | <b>Tumor EC</b> |
|------------------------------|-----------------|-----------------------|-----------------|
| PRSS1 (NM_002769)            | Hs00605631_g1   | 108 bp                | -               |
| PRSS2 (NM_002770)            | Hs00828418_gH   | 150 bp                | -               |
| PRSS3 (NM_007343, NM_002771) | Hs00605637_m1   | 157 bp                | +               |
| TFPI-2 (NM_006528)           | Hs00197918_m1   | 84 bp                 | +               |
| 18s rRNA                     | Hs99999901_s1   | 187 bp                | +               |
